# Supplementary material for: A coordinatively cross-linked polymeric network as a functional binder for high-performance silicon submicro-particle anodes in lithium-ion batteries
Source: Royal Society of Chemistry journal article supplement (doi:10.1039/c4ta04320k), 2014-09-19
Supplement: c4ta04320k1.pdf [file c4ta04320k1.pdf]

## Supporting information

# Coordinatively Cross-Linked Polymeric Network as Functional Binder for High-Performance Silicon Submicro-Particle Anodes in Lithium-Ion Batteries

Li Zhang<sup>\*‡</sup>, Liya Zhang<sup>‡</sup>, Lili Chai, Peng Xue, Weiwei Hao and Honghe Zheng<sup>\*</sup>

*College of Physics, Optoelectronics and Energy & Collaborative Innovation Center of Suzhou Nano Science and Technology, Soochow University, Suzhou, Jiangsu, 215006, P. R. China.*

*E-mail: [zhangli81@suda.edu.cn](mailto:zhangli81@suda.edu.cn), [hhzheng@suda.edu.cn](mailto:hhzheng@suda.edu.cn)*

*‡ These authors contributed to this work equally*

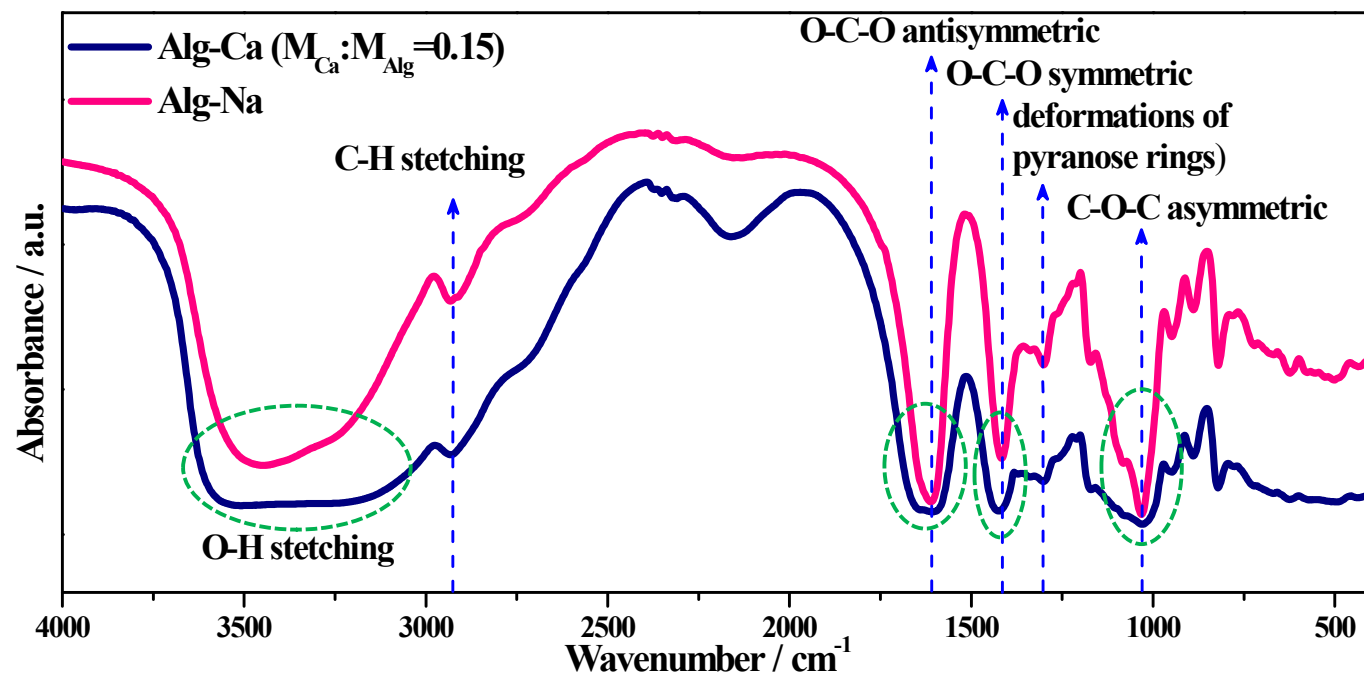

**Figure S1.** Fourier transform infrared spectra (FTIR) of the Na-alginate binder before and after cross-linked by additive  $\text{Ca}^{2+}$  cations.

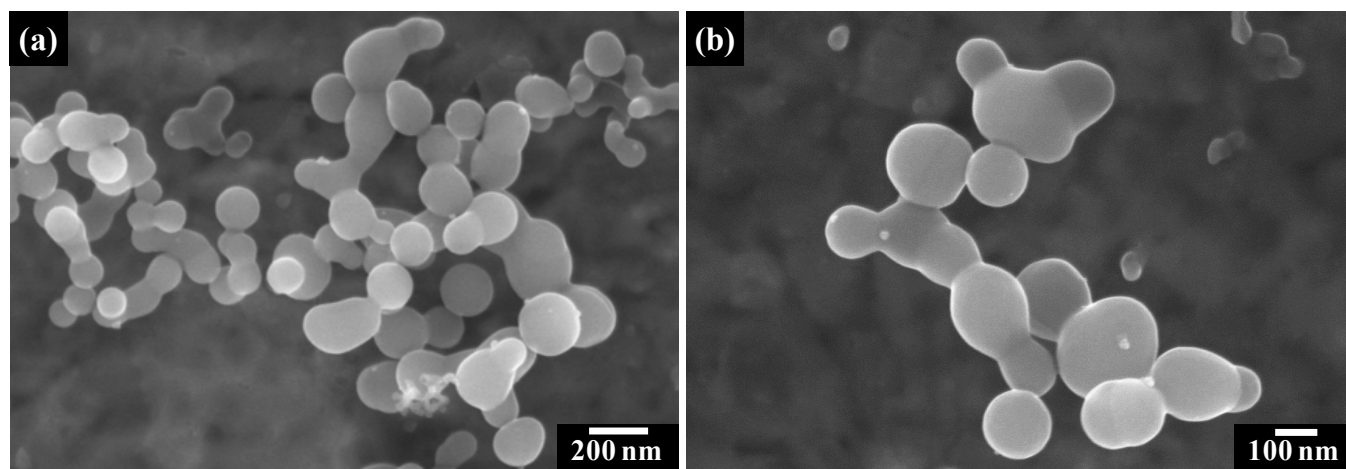

**Figure S2.** SEM images of commercial silicon submicro-particles (SiSMPs) used in our studies with different magnifications.

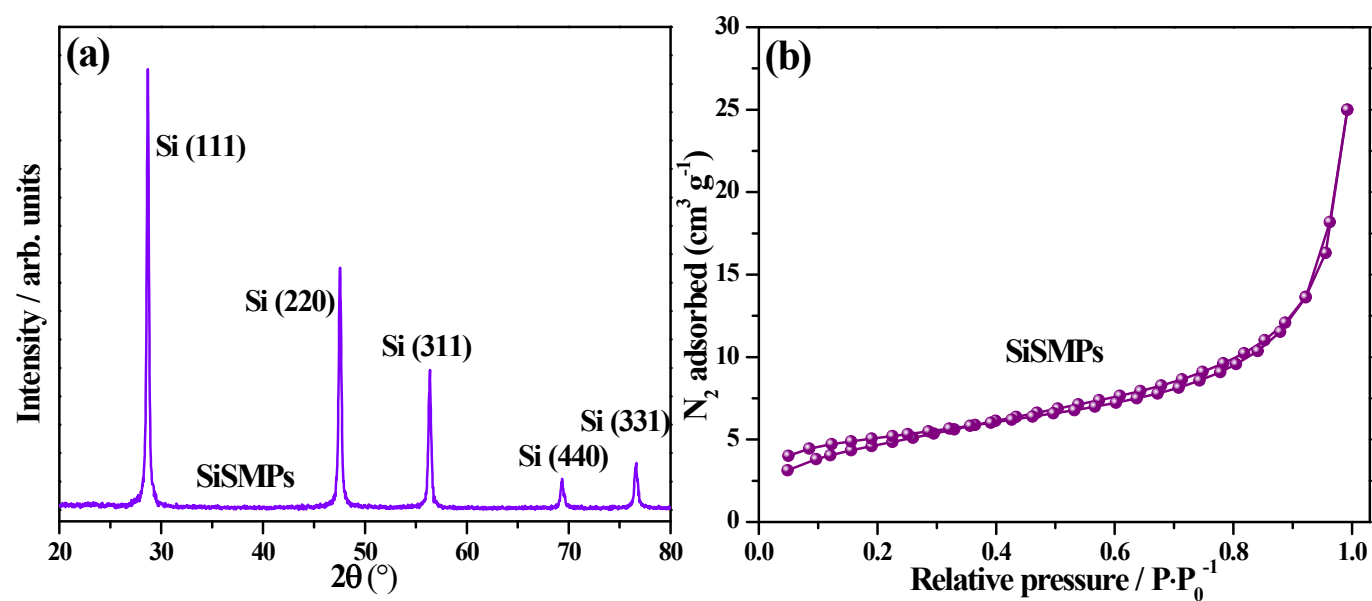

**Figure S3.** (a) X-ray diffraction pattern and (b)  $N_2$  sorption isotherms of the commercial silicon submicro-particles (SiSMPs) used in this work.

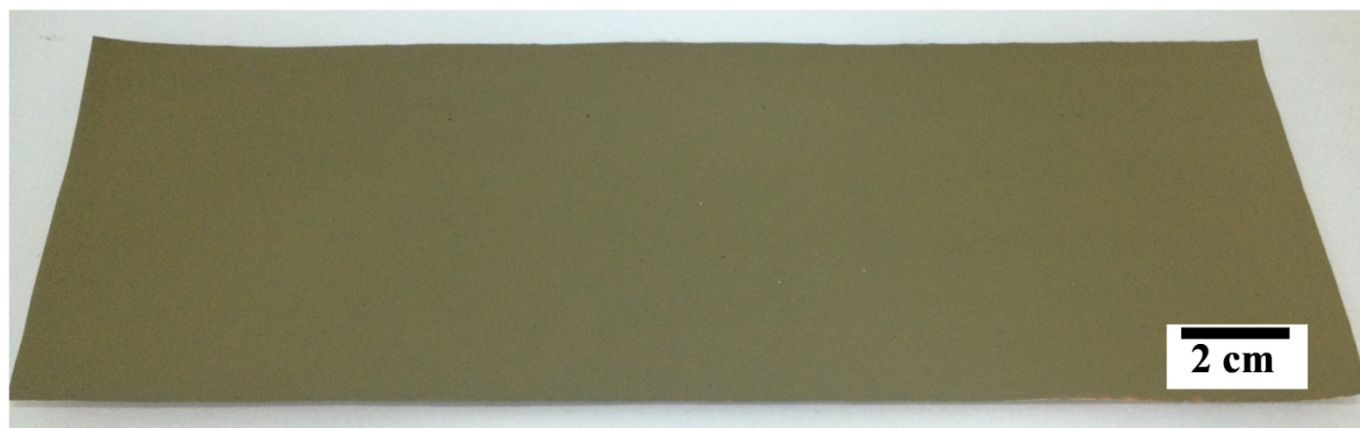

**Figure S4.** A digital photograph of a uniformly coated electrode film (7 cm × 23 cm) consisting of SiSMPs, Super P carbon black and 3D alginate network.

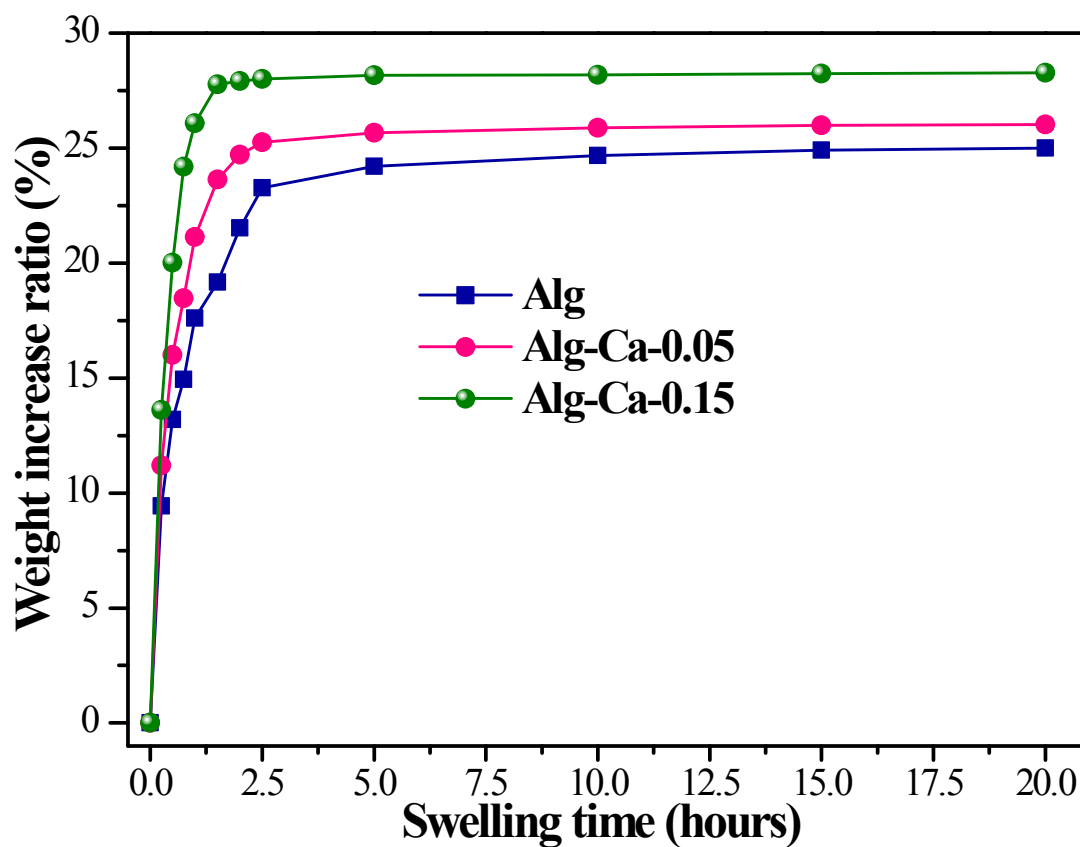

**Figure S5.** The swelling tests of pure alginate, Alg-Ca-0.05 and Alg-Ca-0.15 sheets in the 1 M LiPF<sub>6</sub> EC/DMC/EMC (1:1:1) electrolyte.

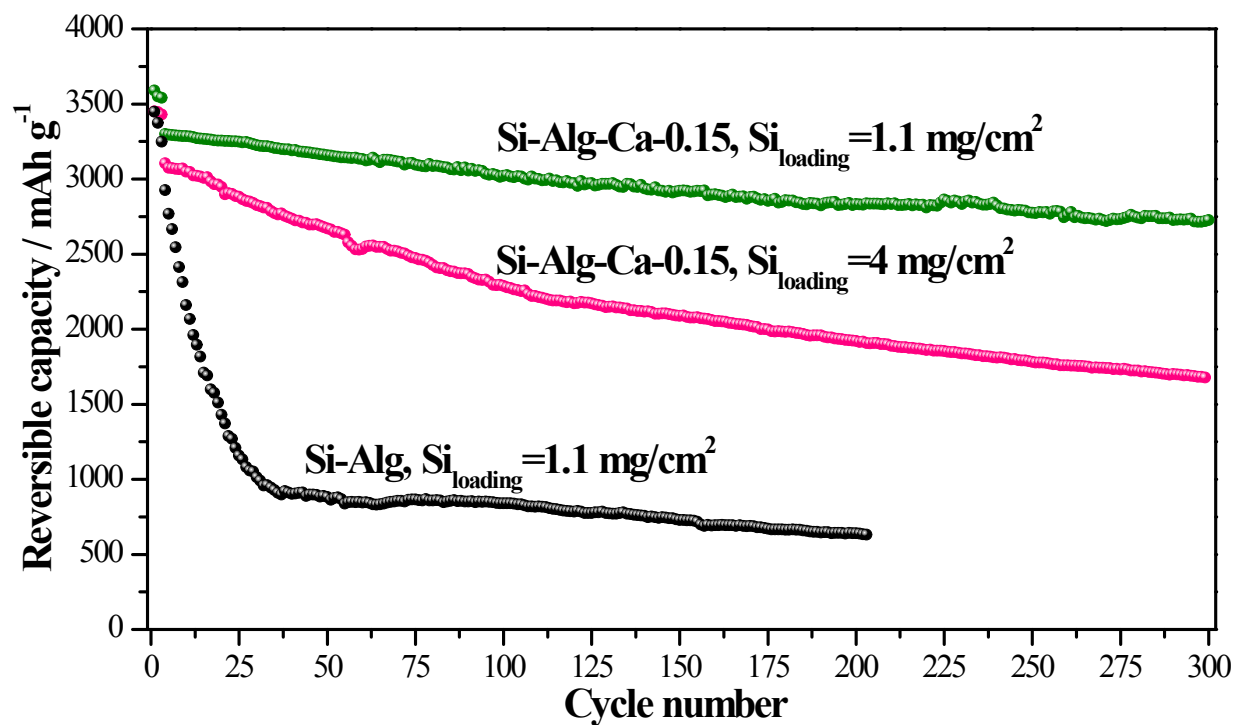

**Figure S6.** Plots of reversible charge capacity versus cycle number for the Si-Alg ( $Si_{loading}=1.1 \text{ mg/cm}^2$ ), Si-Alg-Ca-0.15 ( $Si_{loading}=1.1 \text{ mg/cm}^2$ ) and Si-Alg-Ca-0.15 ( $Si_{loading}=4 \text{ mg/cm}^2$ ) electrodes.
